# Supplementary material for: Effect of Epichloë gansuensis Endophyte on Seed-Borne Microbes and Seed Metabolites in Achnatherum inebrians
Source: PubMed Central journal article supplement (PMC10100691; doi:10.1128/spectrum.01350-22), 2023-02-14
Supplement: spectrum.01350-22-s0001.pdf [file spectrum.01350-22-s0001.pdf]

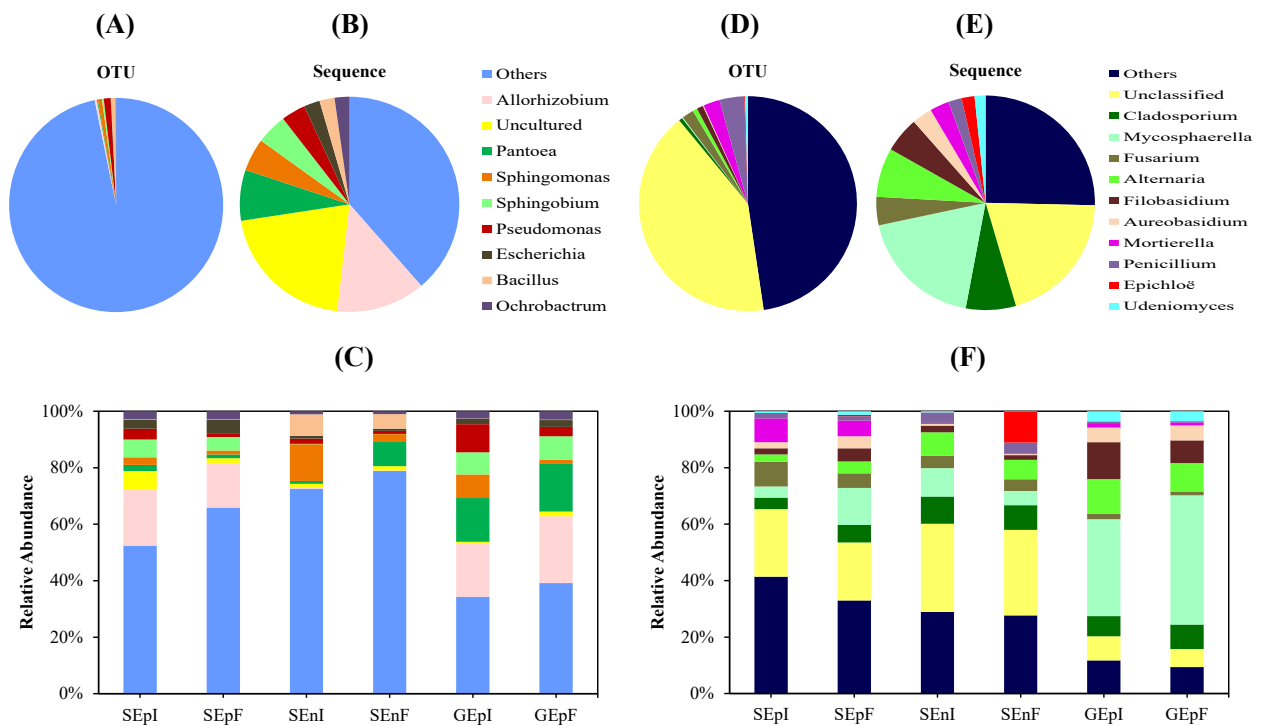

**Figure S1. Taxonomic composition of microbial communities of seeds and glumes of *A. inebrians***

Operational taxonomic unit (OTU) of (A) bacteria and (D) fungi, sequence of (B) bacteria and (E) fungi in all samples and relative abundance of (C) bacteria and (F) fungi at the genus level located on or in *A. inebrians* seed and in endophyte treatments (SEpI (seed epiphytic microbes of the seed-borne of endophyte-infected plants), SEpF (seed epiphytic microbes of the seed-borne of endophyte-free plants), SEnI (seed endophytic microbes of the seed-borne of endophyte-infected plants), SEnF (seed endophytic microbes of the seed-borne of endophyte-free plants), GEpI (glume microbial community of endophyte-infected plants), GEpF (glume microbial community of endophyte-free plants), n=8). See also Table S1.

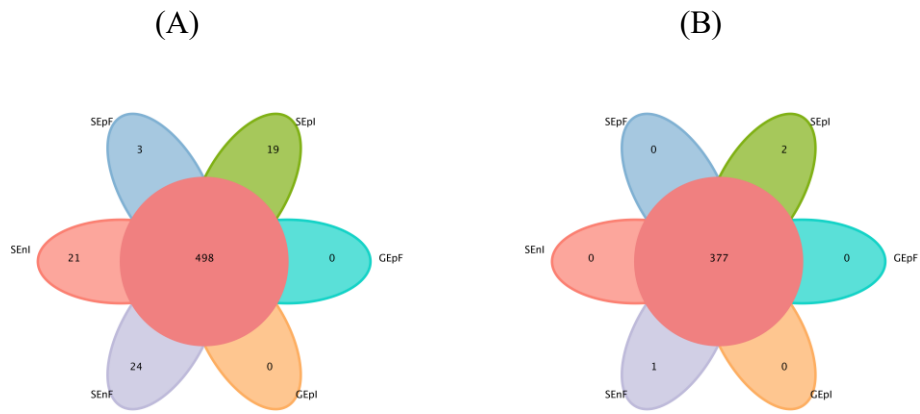

**Figure S2.** Venn diagram within seed and glume bacterial (A) and fungal (B) OTUs in and on EI and EF seeds and glumes of *Achnatherum inebrians*, (n=8).

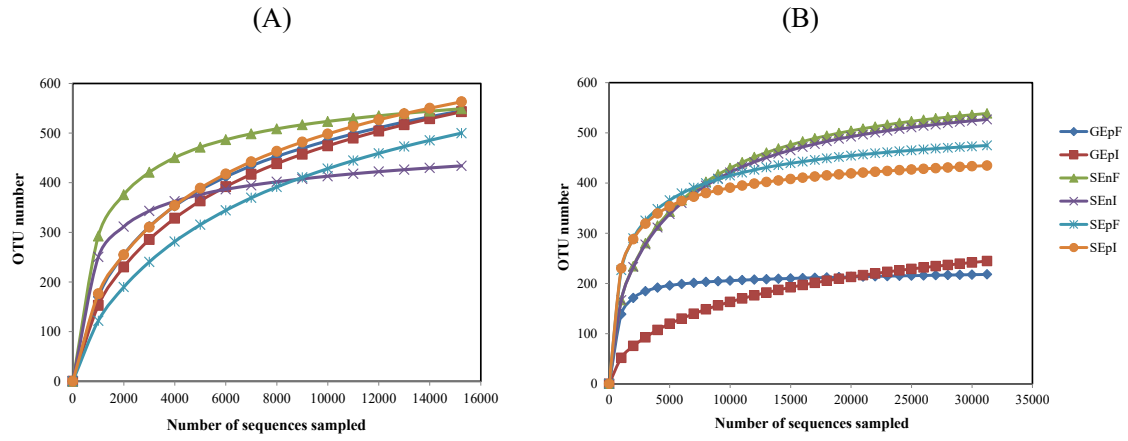

**Figure S3.** Rarefaction curves of the 16S rRNA and ITS gene sequence from the seed and glume bacteria (A) and fungi (B) in and on seeds and glumes of EI and EF *Achnatherum inebrians*, (n=8).

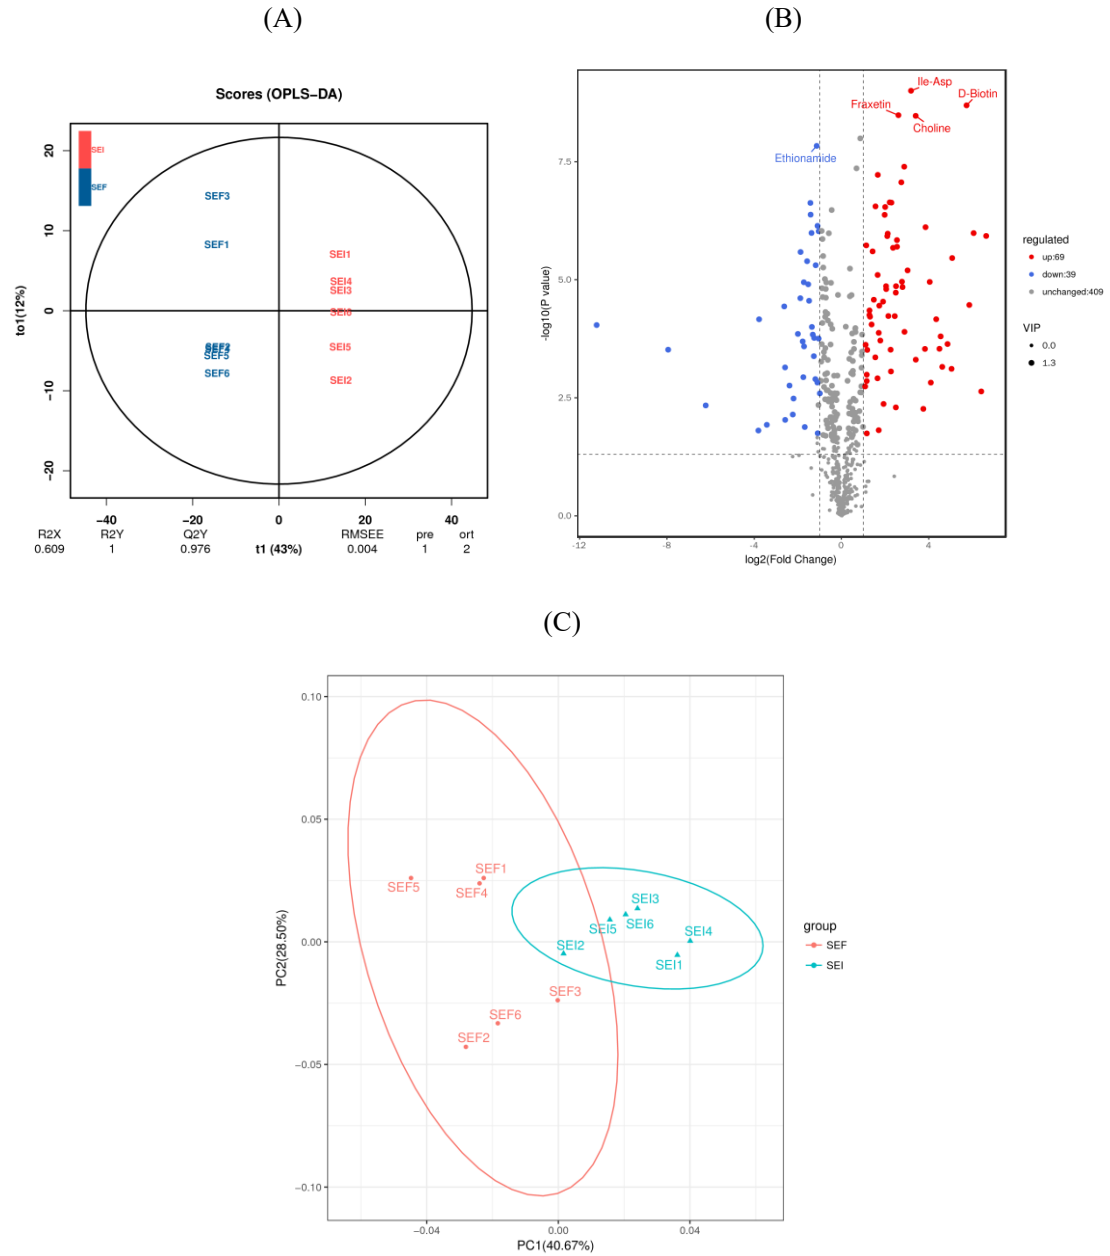

**Figure S4.** Identification of metabolites differentially accumulated in EI and EF of *Achnatherum inebrians* seeds. (A) The orthogonal projections to latent structures-discriminant analysis (OPLS-DA) score plot. (B) Volcano plot showing the increased and decreased metabolites between EI and EF. (C) Principal component analysis score plot based on the 517 detected metabolites, (n=6).

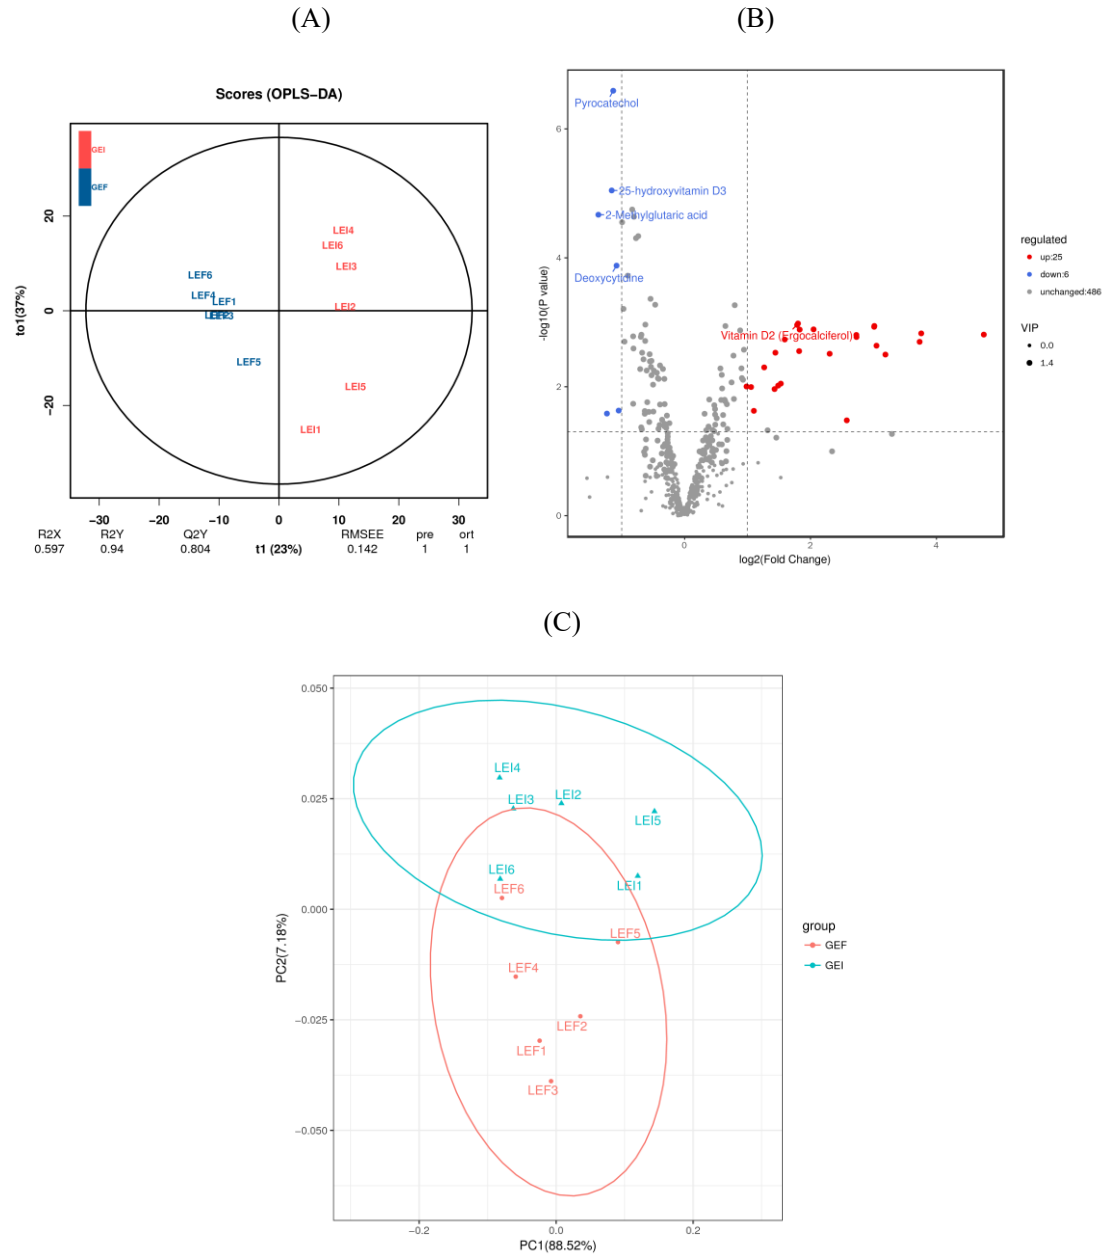

**Figure S5.** Identification of metabolites differentially accumulated in EI and EF glumes of *Achnatherum inebrians*. (A) The orthogonal projections to latent structures-discriminant analysis (OPLS-DA) score plot. (B) Volcano plot showing the increased and decreased metabolites between EI and EF. (C) Principal component analysis score plot based on the 517 detected metabolites, (n=6).

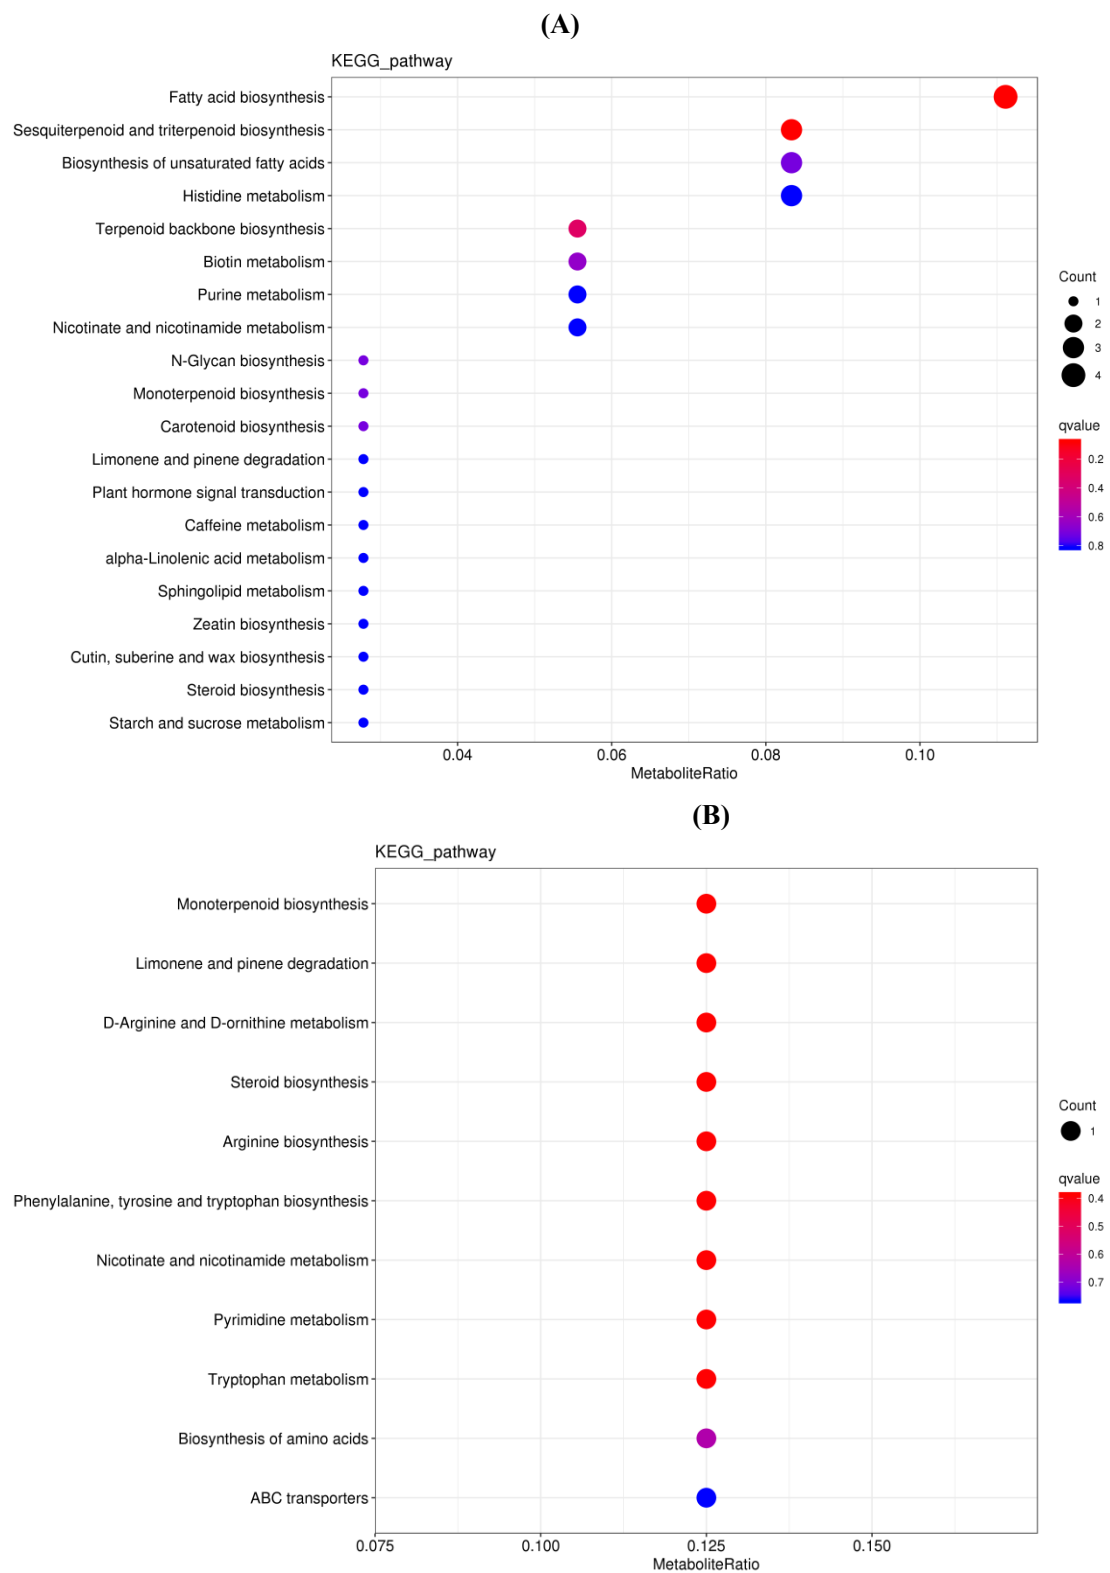

**Figure S6.** KEGG pathway enriched dotplot of differential metabolites in the EI as compared to the EF of seeds (A) and glumes (B) of *Achnatherum inebrians*.

**Table S1.** Seed and glume bacterial and fungal community composition in and on seeds and glumes of endophyte-infected (EI) and endophyte-free (EF) *Achnatherum inebrians* at the phylum level (SEpI (seed epiphytic microbes of the seed-borne of endophyte-infected plants), SEpF (seed epiphytic microbes of the seed-borne of endophyte-free plants), SENI (seed endophytic microbes of the seed-borne of endophyte-infected plants), SENF (seed endophytic microbes of the seed-borne of endophyte-free plants), GEpI (glume microbial community of endophyte-infected plants), GEpF (glume microbial community of endophyte-free plants), n=8).

| Microbes | Phylum            | Relative abundance (%) |       |       |       |       |       |        |          |                       |       |       |       |       |       |       |      |          |
|----------|-------------------|------------------------|-------|-------|-------|-------|-------|--------|----------|-----------------------|-------|-------|-------|-------|-------|-------|------|----------|
|          |                   | SEpI                   | SEpF  | SEnI  | SEnF  | GEpI  | GEpF  | OTU    | Sequence | Genus                 | SEpI  | SEpF  | SEnI  | SEnF  | GEpI  | GEpF  | OTU  | Sequence |
| Bacteria | Proteobacteria    | 58.4%                  | 53.5% | 45.6% | 46.4% | 75.8% | 68.6% | 493    | 424942   | Others                | 52.4% | 65.9% | 72.6% | 78.8% | 34.4% | 39.2% | 1413 | 283130   |
|          | Actinobacteria    | 7.3%                   | 18.0% | 19.5% | 19.9% | 11.1% | 8.8%  | 251    | 103269   | <i>Allorhizobium</i>  | 19.8% | 15.8% | 0.3%  | 0.2%  | 19.0% | 23.6% | 5    | 96129    |
|          | Firmicutes        | 12.4%                  | 9.6%  | 20.6% | 15.5% | 3.5%  | 5.9%  | 243    | 82368    | Unclassified          | 6.6%  | 1.6%  | 1.4%  | 1.5%  | 0.4%  | 1.7%  | 0    | 151827   |
|          | Bacteroidetes     | 11.9%                  | 3.8%  | 5.7%  | 6.5%  | 1.9%  | 4.4%  | 204    | 41724    | <i>Pantoea</i>        | 2.2%  | 1.4%  | 1.0%  | 8.5%  | 15.6% | 17.1% | 2    | 55886    |
|          | Cyanobacteria     | 4.8%                   | 5.6%  | 0.0%  | 0.0%  | 5.1%  | 9.6%  | 9      | 30647    | <i>Sphingomonas</i>   | 2.7%  | 1.4%  | 13.0% | 2.8%  | 8.3%  | 1.2%  | 9    | 35913    |
|          | Acidobacteria     | 1.3%                   | 4.1%  | 1.8%  | 3.0%  | 1.1%  | 1.3%  | 89     | 15432    | <i>Sphingobium</i>    | 6.3%  | 4.7%  | 0.1%  | 0.0%  | 7.9%  | 8.3%  | 4    | 33412    |
|          | Gemmatimonadetes  | 0.7%                   | 1.1%  | 2.6%  | 4.0%  | 0.2%  | 0.1%  | 62     | 10595    | <i>Pseudomonas</i>    | 3.8%  | 1.4%  | 1.9%  | 1.1%  | 10.0% | 3.4%  | 15   | 26224    |
|          | Chloroflexi       | 0.5%                   | 1.4%  | 1.6%  | 0.8%  | 0.3%  | 0.5%  | 34     | 6245     | <i>Escherichia</i>    | 3.2%  | 4.9%  | 0.9%  | 0.7%  | 2.0%  | 2.4%  | 1    | 17216    |
|          | Nitrospirae       | 0.1%                   | 0.2%  | 0.6%  | 1.4%  | 0.2%  | 0.0%  | 7      | 3106     | <i>Bacillus</i>       | 0.2%  | 0.1%  | 7.7%  | 5.2%  | 0.1%  | 0.1%  | 10   | 16261    |
|          | Rokubacteria      | 0.1%                   | 0.6%  | 0.5%  | 0.9%  | 0.2%  | 0.1%  | 17     | 2860     | <i>Ochrobactrum</i>   | 2.8%  | 2.8%  | 1.1%  | 1.0%  | 2.5%  | 3.0%  | 1    | 16098    |
|          | Others            | 2.5%                   | 2.0%  | 1.5%  | 1.6%  | 0.7%  | 0.6%  | 51     | 10908    | Total                 | 100%  | 100%  | 100%  | 100%  | 100%  | 100%  | 1460 | 732096   |
| Total    | 100%              | 100%                   | 100%  | 100%  | 100%  | 100%  | 1460  | 732096 |          |                       |       |       |       |       |       |       |      |          |
| Fungi    | Ascomycota        | 74.2%                  | 73.2% | 81.8% | 81.2% | 83.3% | 76.2% | 505    | 1183101  | Others                | 41.4% | 33.0% | 28.9% | 27.7% | 11.8% | 9.4%  | 351  | 383122   |
|          | Basidiomycota     | 13.5%                  | 8.7%  | 7.4%  | 8.3%  | 13.5% | 19.0% | 95     | 177697   | Unclassified          | 23.9% | 20.6% | 31.2% | 30.3% | 8.6%  | 6.4%  | 305  | 304354   |
|          | Mortierellomycota | 5.7%                   | 8.5%  | 0.9%  | 0.9%  | 1.1%  | 1.6%  | 24     | 47257    | <i>Cladosporium</i>   | 4.1%  | 6.2%  | 9.6%  | 8.7%  | 7.2%  | 8.7%  | 4    | 111807   |
|          | Chytridiomycota   | 0.3%                   | 0.5%  | 0.1%  | 0.1%  | 0.1%  | 0.1%  | 7      | 2795     | <i>Mycosphaerella</i> | 3.9%  | 13.1% | 10.1% | 5.0%  | 34.3% | 45.8% | 1    | 282503   |

|               |      |      |      |      |      |      |     |         |                      |      |      |      |       |       |       |     |         |
|---------------|------|------|------|------|------|------|-----|---------|----------------------|------|------|------|-------|-------|-------|-----|---------|
| Olpidiomycota | 0.2% | 0.2% | 0.1% | 0.1% | 0.1% | 0.1% | 2   | 1831    | <i>Fusarium</i>      | 8.8% | 5.2% | 4.3% | 4.1%  | 1.9%  | 1.3%  | 13  | 64648   |
| Zoopagomycota | 0.1% | 0.1% | 0.0% | 0.0% | 0.0% | 0.0% | 1   | 632     | <i>Alternaria</i>    | 2.6% | 4.2% | 8.3% | 6.9%  | 12.3% | 10.1% | 5   | 111727  |
| Mucoromycota  | 0.0% | 0.0% | 0.0% | 0.0% | 0.0% | 0.0% | 2   | 344     | <i>Filobasidium</i>  | 2.2% | 4.6% | 2.4% | 1.6%  | 13.1% | 8.0%  | 7   | 80358   |
| Rozellomycota | 0.0% | 0.0% | 0.0% | 0.0% | 0.0% | 0.0% | 1   | 293     | <i>Aureobasidium</i> | 2.1% | 4.3% | 0.7% | 0.4%  | 5.2%  | 5.3%  | 1   | 45448   |
| Unclassified  | 6.0% | 8.6% | 9.6% | 9.3% | 1.9% | 2.9% | 99  | 96418   | <i>Mortierella</i>   | 8.4% | 5.5% | 0.3% | 0.2%  | 1.6%  | 1.1%  | 18  | 43034   |
| Total         | 100% | 100% | 100% | 100% | 100% | 100% | 736 | 1510368 | <i>Penicillium</i>   | 1.9% | 1.5% | 3.7% | 3.8%  | 0.6%  | 0.4%  | 27  | 30048   |
|               |      |      |      |      |      |      |     |         | <i>Epichloë</i>      | 0.0% | 0.5% | 0.0% | 10.9% | 0.0%  | 0.0%  | 1   | 28921   |
|               |      |      |      |      |      |      |     |         | <i>Udeniomyces</i>   | 0.6% | 1.3% | 0.4% | 0.2%  | 3.7%  | 3.5%  | 3   | 24398   |
|               |      |      |      |      |      |      |     |         | Total                | 100% | 100% | 100% | 100%  | 100%  | 100%  | 736 | 1510368 |

---



**Supplement excel tables titles:**

**Table S2.** The matrix of bacterial OTUs

**Table S3.** The matrix of fungal OTUs

**Table S4.** Detected metabolites of EI and EF seeds

**Table S5.** Detected metabolites of EI and EF glumes

**Table S6.** Differential metabolites of EI and EF seeds

**Table S7.** Differential metabolites of EI and EF glumes

**Table S8.** Spearman's correlation networks between seeds epiphytic bacterial phyla and seeds metabolites

**Table S9.** Spearman's correlation networks between seeds epiphytic fungal phyla and seeds metabolites

**Table S10.** Spearman's correlation networks between seeds endophytic bacterial phyla and seeds metabolites

**Table S11.** Spearman's correlation networks between seeds endophytic fungal phyla and seeds metabolites

**Table S12.** Spearman's correlation networks between glumes epiphytic bacterial phyla and glumes metabolites

**Table S13.** Spearman's correlation networks between glumes epiphytic fungal phyla and glumes metabolites
